# Supplementary material
Source: PubMed Central journal article supplement (PMC6092770)

**Supplementary Table.** Calculated dice indices (DIs) in seven animals between the H&E pallor areas and segmented cerebral ischemic lesions on DWI. Mean DI with 83 THR<sub>relative</sub> (DI=0.820 %) was the best among all the thresholds even though the 530 THR<sub>absolute</sub> was the most comparable among conventional absolute thresholds. It suggested that segmentation with 83 THR<sub>relative</sub> as the threshold was more congruous with H&E gross pathology at 1 hour.

| Animal number | Absolute thresholding of the ADC <sub>original</sub> |              |              |              |              |       |              | Relative thresholding of the ADC <sub>normalized</sub> |       |              |              |              |       |       |
|---------------|------------------------------------------------------|--------------|--------------|--------------|--------------|-------|--------------|--------------------------------------------------------|-------|--------------|--------------|--------------|-------|-------|
|               | 500                                                  | 510          | 520          | 530          | 540          | 550   | 560          | 80                                                     | 81    | 82           | 83           | 84           | 85    | 86    |
| 5             | 0.862                                                | 0.879        | 0.895        | <b>0.904</b> | 0.896        | 0.892 | 0.886        | 0.884                                                  | 0.888 | 0.894        | <b>0.904</b> | 0.903        | 0.897 | 0.882 |
| 6             | 0.770                                                | 0.813        | 0.844        | 0.857        | 0.869        | 0.882 | <b>0.885</b> | 0.842                                                  | 0.859 | 0.868        | 0.878        | <b>0.883</b> | 0.880 | 0.876 |
| 8             | 0.828                                                | <b>0.843</b> | 0.829        | 0.827        | 0.825        | 0.812 | 0.792        | 0.834                                                  | 0.836 | 0.842        | <b>0.841</b> | 0.836        | 0.829 | 0.799 |
| 10            | 0.694                                                | 0.700        | 0.707        | 0.711        | <b>0.716</b> | 0.714 | 0.711        | 0.708                                                  | 0.709 | <b>0.713</b> | <b>0.713</b> | 0.711        | 0.710 | 0.707 |
| 11            | <b>0.739</b>                                         | 0.734        | 0.733        | 0.731        | 0.730        | 0.726 | 0.713        | 0.739                                                  | 0.743 | 0.744        | <b>0.745</b> | 0.742        | 0.737 | 0.734 |
| 12            | 0.833                                                | <b>0.836</b> | 0.830        | 0.821        | 0.810        | 0.796 | 0.789        | 0.806                                                  | 0.812 | 0.821        | <b>0.836</b> | 0.830        | 0.823 | 0.820 |
| 22            | 0.819                                                | 0.820        | <b>0.821</b> | 0.819        | 0.817        | 0.809 | 0.807        | 0.816                                                  | 0.820 | <b>0.823</b> | 0.822        | 0.820        | 0.817 | 0.811 |
| Mean          | 0.792                                                | 0.804        | 0.808        | <b>0.810</b> | 0.809        | 0.804 | 0.798        | 0.804                                                  | 0.810 | 0.815        | <b>0.820</b> | 0.818        | 0.813 | 0.804 |

**Supplementary figure.** The intensity distribution of the left hemisphere of original ADC ( $ADC_{original}$ ) and normalized ADC ( $ADC_{normalized}$ ). Five peaks of histograms from 5 MR scans at 5 different time points in representative animal 5 showed intra-subject variation (A) and 8 peaks from 8 animals with territorial sustained MCAO at 15 minutes also demonstrated inter-subject variation (C). Those peaks representing the variations were aligned after the normalization process (B, D).

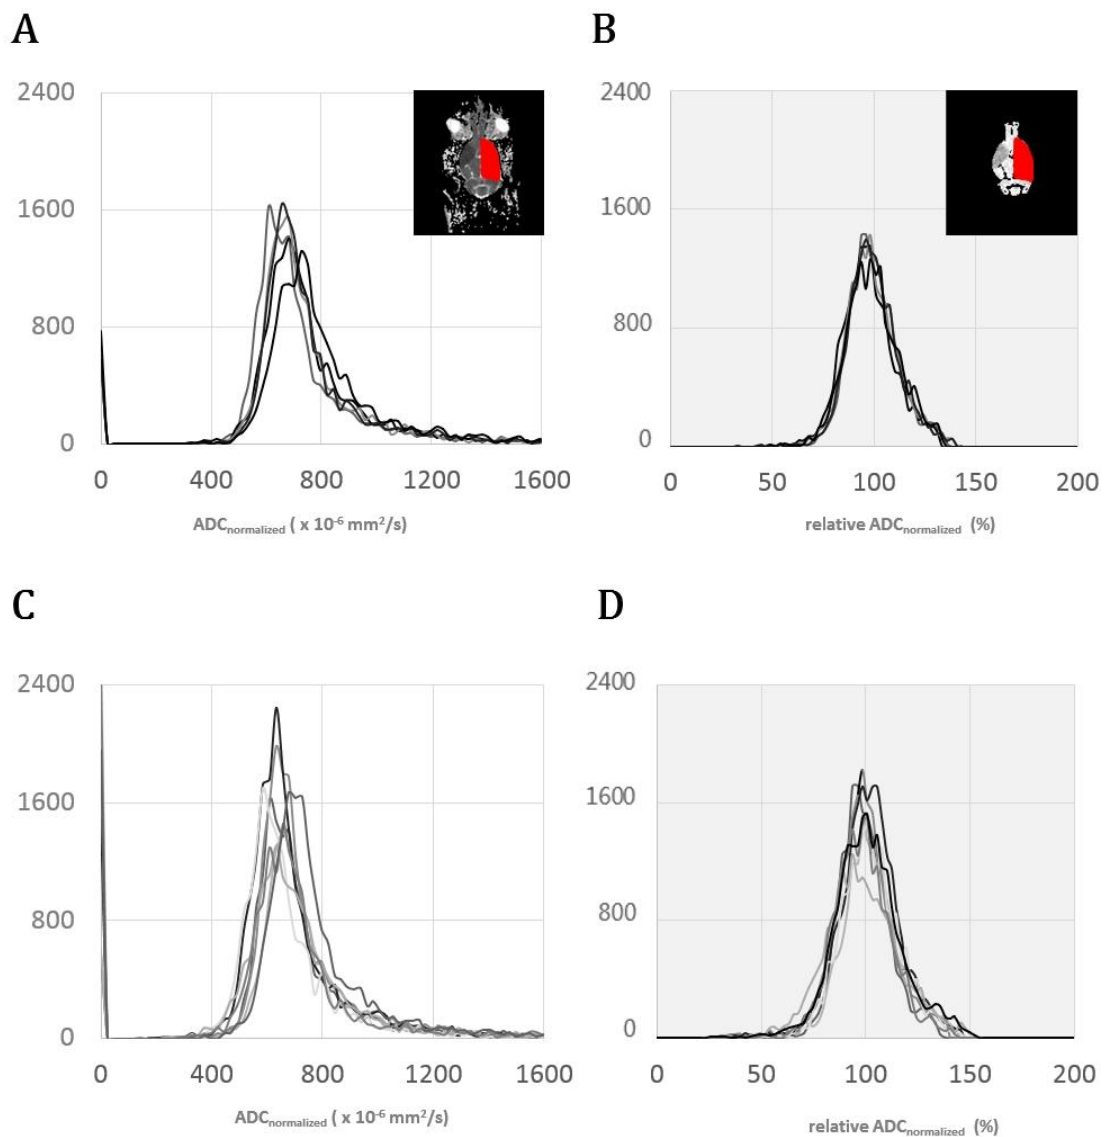

Supplement: JCB714179_supplementary_material.pdf [file JCB714179_supplementary_material.pdf]
